# Supplementary material
Source: HighWire-hosted journal article supplement (http://www.cmaj.ca/highwire/filestream/59790/field_highwire_adjunct_files/1/151027-res-2-at.pdf)
Supplement: 151027-res-2-at.pdf [file 151027-res-2-at.pdf]

**Appendix 2 (as supplied by the authors):** Unadjusted and adjusted prevalence ratios for influenza immunization

|                                       | <b>Unadjusted Prevalence Ratio<br/>(95%CI)</b> | <b>Adjusted Prevalence Ratio<br/>(95%CI)*†</b> |
|---------------------------------------|------------------------------------------------|------------------------------------------------|
| Urban residence                       | 1.03 (1.02-1.05)                               | 1.10 (1.08-1.12)                               |
| Income quartile                       |                                                |                                                |
| Lowest                                | 1.00                                           | 1.00                                           |
| Lower-middle                          | 1.19 (1.17-1.21)                               | 1.00 (0.96-1.04)                               |
| Upper middle                          | 1.05 (1.03-1.07)                               | 1.02 (0.98-1.06)                               |
| Highest                               | 0.91 (0.90-0.93)                               | 1.06 (1.02-1.10)                               |
| Not stated                            | 1.03 (1.01-1.05)                               | 1.02 (0.98-1.07)                               |
| Educational attainment                |                                                |                                                |
| Some secondary                        | 1.00                                           | 1.00                                           |
| Secondary                             | 0.85 (0.82-0.87)                               | 0.96 (0.94-0.99)                               |
| Some post-secondary                   | 0.70 (0.67-0.72)                               | 0.93 (0.90-0.97)                               |
| Post-secondary                        | 0.91 (0.89-0.93)                               | 1.07 (1.05-1.09)                               |
| Not stated                            | 0.97 (0.92-1.01)                               | 1.05 (0.98-1.13)                               |
| Marital status                        |                                                |                                                |
| Single                                | 1.00                                           | 1.00                                           |
| Separated/widowed/divorced            | 2.10 (2.05-2.15)                               | 1.01 (0.98-1.05)                               |
| Married/common-law                    | 1.64 (1.60-1.67)                               | 1.05 (1.02-1.08)                               |
| Immigration status                    |                                                |                                                |
| Canadian-born                         | 1.00                                           | 1.00                                           |
| Long-term resident ( $\geq 11$ years) | 1.22 (1.19-1.24)                               | 0.90 (0.88-0.93)                               |
| Recent immigrant (<10 years)          | 0.75 (0.71-0.78)                               | 0.94 (0.88-0.99)                               |
| Racial or cultural group              |                                                |                                                |
| White                                 | 1.00                                           | 1.00                                           |
| Black                                 | 0.81 (0.75-0.88)                               | 1.05 (0.97-1.13)                               |
| Korean                                | 0.95 (0.78-1.14)                               | 1.26 (1.05-1.50)                               |
| Filipino                              | 1.19 (1.10-1.28)                               | 1.42 (1.31-1.54)                               |
| Japanese                              | 1.33 (1.10-1.55)                               | 1.22 (1.05-1.42)                               |
| Chinese                               | 1.03 (0.98-1.09)                               | 1.18 (1.12-1.25)                               |
| South Asian                           | 1.00 (0.95-1.05)                               | 1.18 (1.11-1.25)                               |
| Southeast Asian                       | 1.05 (0.94-1.17)                               | 1.35 (1.21-1.50)                               |
| Arab                                  | 0.55 (0.47-0.63)                               | 0.85 (0.73-0.99)                               |
| West Asian                            | 0.77 (0.62-0.95)                               | 1.02 (0.84-1.25)                               |

|                                     |                  |                  |
|-------------------------------------|------------------|------------------|
| Latin American                      | 0.71 (0.62-0.80) | 1.04 (0.93-1.18) |
| Aboriginal                          | 0.86 (0.83-0.89) | 1.02 (0.98-1.06) |
| Multiple                            | 0.82 (0.75-0.91) | 1.07 (0.97-1.18) |
| Other                               | 0.78 (0.68-0.90) | 0.98 (0.85-1.12) |
| Not Stated                          | 1.05 (1.00-1.09) | 1.08 (0.99-1.19) |
| Self-reported health status         |                  |                  |
| Poor                                | 1.00             | 1.00             |
| Fair                                | 0.88 (0.84-0.91) | 1.01 (0.97-1.05) |
| Good/very good/excellent            | 0.59 (0.56-0.61) | 0.94 (0.91-0.98) |
| Body mass index category            |                  |                  |
| Normal/underweight ( $\leq 24.9$ )  | 1.00             | 1.00             |
| Overweight (25.0-29.9)              | 1.17 (1.15-1.20) | 1.04 (1.02-1.06) |
| Obese ( $\geq 30.0$ )               | 1.28 (1.25-1.31) | 1.08 (1.06-1.11) |
| Not Stated                          | 1.17 (1.12-1.22) | 1.05 (1.01-1.10) |
| Child <5 years of age in household  | 0.76 (0.74-0.79) | 1.15 (1.11-1.18) |
| Smoking                             |                  |                  |
| Never                               | 1.00             | 1.00             |
| Former                              | 1.18 (1.16-1.20) | 1.00 (0.98-1.02) |
| Daily                               | 0.70 (0.69-0.72) | 0.82 (0.79-0.84) |
| Had pandemic A/H1N1 vaccine in 2009 | 5.30 (4.97-5.65) | 4.07 (3.81-4.34) |

\*Multivariable regression included a sample of 456,881 respondents for which there was complete information on all covariates. Also adjusted for presence of a pharmacist policy, presence of universal funding for influenza vaccines, age group, sex, chronic conditions, province, and season (see Table 4).
